# Supplementary material
Source: MDPI journal article supplement (https://www.mdpi.com/2073-4395/8/9/179)
Supplement: s1 [file s1]

## Supplementary information

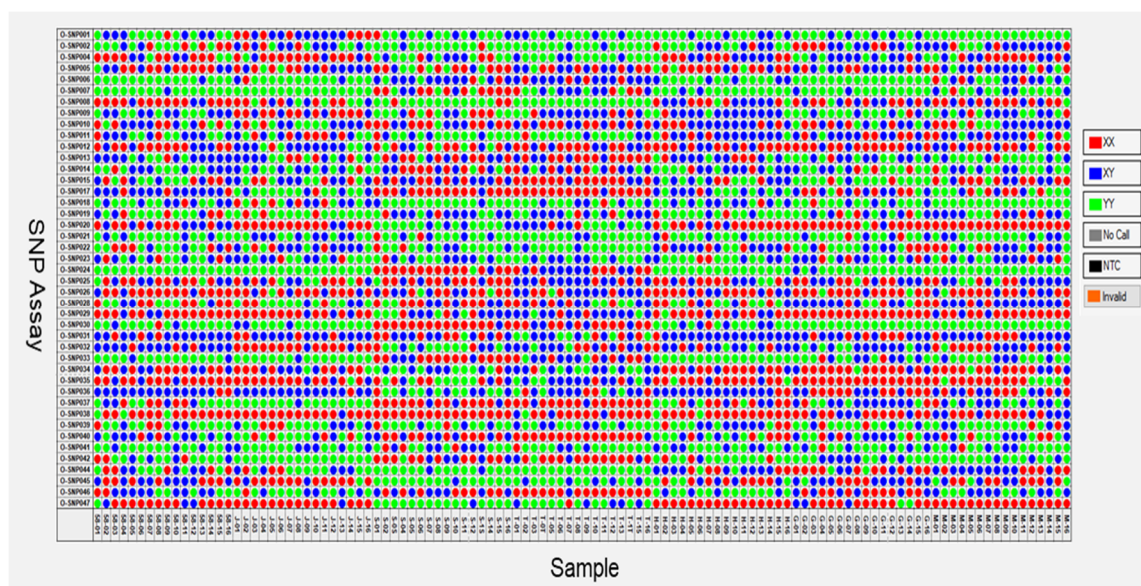

**Figure S1.** Call map view from the dynamic array of SNP fingerprints of genotyped onion varieties from Fluidigm Genotyping Analysis Software.

**Table S1.** Allele Frequencies in 16 samples ( $N = 16$ ) of each of seven open-pollinated onion cultivars at different SNP positions of 43 SNP markers. Allele/n designates the positions of SNP under each marker those are variable across seven cultivars.

| Locus    | Allele/n | S&P2  | Jelppareun | Singsingball | Taegeukhwang | Hamaemi | Gwigeum | Marushino |
|----------|----------|-------|------------|--------------|--------------|---------|---------|-----------|
| O-SNP001 | 11       | 0.063 | 0.250      | 0.063        | 0.000        | 0.000   | 0.000   | 0.000     |
|          | 14       | 0.438 | 0.625      | 0.313        | 0.313        | 0.250   | 0.250   | 0.063     |
|          | 44       | 0.500 | 0.125      | 0.625        | 0.688        | 0.750   | 0.750   | 0.938     |
| O-SNP002 | 11       | 0.250 | 0.250      | 0.063        | 0.000        | 0.125   | 0.375   | 0.250     |
|          | 13       | 0.125 | 0.500      | 0.063        | 0.125        | 0.438   | 0.438   | 0.500     |
|          | 33       | 0.625 | 0.250      | 0.875        | 0.875        | 0.438   | 0.188   | 0.250     |
| O-SNP004 | 11       | 0.625 | 0.813      | 0.188        | 0.000        | 0.375   | 0.063   | 0.438     |
|          | 13       | 0.313 | 0.125      | 0.313        | 0.250        | 0.563   | 0.625   | 0.375     |
|          | 33       | 0.063 | 0.063      | 0.500        | 0.750        | 0.063   | 0.313   | 0.188     |
| O-SNP005 | 11       | 0.625 | 0.438      | 0.563        | 0.438        | 0.625   | 0.267   | 0.375     |
|          | 12       | 0.250 | 0.375      | 0.125        | 0.500        | 0.188   | 0.600   | 0.500     |
|          | 22       | 0.125 | 0.188      | 0.313        | 0.063        | 0.188   | 0.133   | 0.125     |
| O-SNP006 | 11       | 0.000 | 0.125      | 0.125        | 0.250        | 0.000   | 0.000   | 0.188     |
|          | 13       | 0.063 | 0.125      | 0.688        | 0.750        | 0.188   | 0.063   | 0.500     |
|          | 33       | 0.938 | 0.750      | 0.188        | 0.000        | 0.813   | 0.938   | 0.313     |
| O-SNP007 | 22       | 0.000 | 0.000      | 0.625        | 0.250        | 0.000   | 0.000   | 0.063     |
|          | 23       | 0.063 | 0.000      | 0.188        | 0.438        | 0.188   | 0.125   | 0.313     |
|          | 33       | 0.938 | 1.000      | 0.188        | 0.313        | 0.813   | 0.875   | 0.625     |
| O-SNP008 | 11       | 0.750 | 0.438      | 0.188        | 0.000        | 0.375   | 0.500   | 0.500     |
|          | 14       | 0.250 | 0.250      | 0.000        | 0.000        | 0.563   | 0.438   | 0.375     |
|          | 44       | 0.000 | 0.313      | 0.813        | 1.000        | 0.063   | 0.063   | 0.125     |
| O-SNP009 | 11       | 0.000 | 0.688      | 0.313        | 0.188        | 0.063   | 0.125   | 0.188     |
|          | 12       | 0.438 | 0.313      | 0.188        | 0.625        | 0.688   | 0.188   | 0.438     |
|          | 22       | 0.563 | 0.000      | 0.500        | 0.188        | 0.250   | 0.688   | 0.375     |
| O-SNP010 | 11       | 0.375 | 0.125      | 0.563        | 0.563        | 0.313   | 0.375   | 0.250     |
|          | 13       | 0.438 | 0.313      | 0.375        | 0.438        | 0.688   | 0.438   | 0.500     |
|          | 33       | 0.188 | 0.563      | 0.063        | 0.000        | 0.000   | 0.188   | 0.250     |

|          |    |       |       |       |       |       |       |       |
|----------|----|-------|-------|-------|-------|-------|-------|-------|
| O-SNP011 | 22 | 0.125 | 0.438 | 0.063 | 0.063 | 0.188 | 0.375 | 0.188 |
|          | 23 | 0.500 | 0.375 | 0.250 | 0.188 | 0.750 | 0.563 | 0.563 |
|          | 33 | 0.375 | 0.188 | 0.688 | 0.750 | 0.063 | 0.063 | 0.250 |
| O-SNP012 | 22 | 0.563 | 0.188 | 0.438 | 0.625 | 0.625 | 0.750 | 0.625 |
|          | 23 | 0.375 | 0.625 | 0.250 | 0.375 | 0.375 | 0.250 | 0.313 |
|          | 33 | 0.063 | 0.188 | 0.313 | 0.000 | 0.000 | 0.000 | 0.063 |
| O-SNP013 | 22 | 0.313 | 0.375 | 0.125 | 0.000 | 0.188 | 0.375 | 0.688 |
|          | 42 | 0.625 | 0.438 | 0.375 | 0.313 | 0.563 | 0.563 | 0.250 |
|          | 44 | 0.063 | 0.188 | 0.500 | 0.688 | 0.250 | 0.063 | 0.063 |
| O-SNP014 | 11 | 0.625 | 0.563 | 0.188 | 0.188 | 0.500 | 0.438 | 0.563 |
|          | 21 | 0.313 | 0.438 | 0.313 | 0.500 | 0.375 | 0.375 | 0.375 |
|          | 22 | 0.063 | 0.000 | 0.500 | 0.313 | 0.125 | 0.188 | 0.063 |
| O-SNP015 | 11 | 0.250 | 0.250 | 0.438 | 0.813 | 0.188 | 0.188 | 0.500 |
|          | 14 | 0.250 | 0.438 | 0.563 | 0.188 | 0.375 | 0.125 | 0.313 |
|          | 44 | 0.500 | 0.313 | 0.000 | 0.000 | 0.438 | 0.688 | 0.188 |
| O-SNP017 | 22 | 0.000 | 0.625 | 0.000 | 0.000 | 0.438 | 0.063 | 0.438 |
|          | 42 | 0.813 | 0.313 | 0.125 | 0.063 | 0.438 | 0.500 | 0.188 |
|          | 44 | 0.188 | 0.063 | 0.875 | 0.938 | 0.125 | 0.438 | 0.375 |
| O-SNP018 | 11 | 0.063 | 0.438 | 0.000 | 0.063 | 0.063 | 0.063 | 0.063 |
|          | 12 | 0.375 | 0.313 | 0.125 | 0.313 | 0.500 | 0.250 | 0.000 |
|          | 22 | 0.563 | 0.250 | 0.875 | 0.625 | 0.438 | 0.688 | 0.938 |
| O-SNP019 | 33 | 0.563 | 0.750 | 0.250 | 0.313 | 0.688 | 0.375 | 0.250 |
|          | 43 | 0.250 | 0.063 | 0.625 | 0.563 | 0.188 | 0.375 | 0.500 |
|          | 44 | 0.188 | 0.188 | 0.125 | 0.125 | 0.125 | 0.250 | 0.250 |
| O-SNP020 | 22 | 0.000 | 0.000 | 0.750 | 0.375 | 0.063 | 0.063 | 0.000 |
|          | 42 | 0.375 | 0.125 | 0.250 | 0.500 | 0.188 | 0.125 | 0.125 |
|          | 44 | 0.625 | 0.875 | 0.000 | 0.125 | 0.750 | 0.813 | 0.875 |
| O-SNP021 | 11 | 0.000 | 0.063 | 0.125 | 0.000 | 0.063 | 0.188 | 0.000 |
|          | 13 | 0.313 | 0.438 | 0.250 | 0.125 | 0.250 | 0.188 | 0.188 |
|          | 33 | 0.688 | 0.500 | 0.625 | 0.875 | 0.688 | 0.625 | 0.813 |
| O-SNP022 | 22 | 0.250 | 0.250 | 0.125 | 0.000 | 0.250 | 0.125 | 0.375 |
|          | 23 | 0.250 | 0.500 | 0.250 | 0.125 | 0.625 | 0.313 | 0.313 |
|          | 33 | 0.500 | 0.250 | 0.625 | 0.875 | 0.125 | 0.563 | 0.313 |
| O-SNP023 | 11 | 0.125 | 0.125 | 0.063 | 0.000 | 0.125 | 0.188 | 0.188 |
|          | 14 | 0.375 | 0.500 | 0.438 | 0.438 | 0.250 | 0.563 | 0.500 |
|          | 44 | 0.500 | 0.375 | 0.500 | 0.563 | 0.625 | 0.250 | 0.313 |
| O-SNP024 | 11 | 0.000 | 0.000 | 0.875 | 0.438 | 0.000 | 0.000 | 0.000 |
|          | 13 | 0.000 | 0.000 | 0.063 | 0.563 | 0.000 | 0.188 | 0.000 |
|          | 33 | 1.000 | 1.000 | 0.063 | 0.000 | 1.000 | 0.813 | 1.000 |
| O-SNP025 | 22 | 0.500 | 0.438 | 0.688 | 0.250 | 0.563 | 0.500 | 0.333 |
|          | 23 | 0.313 | 0.250 | 0.250 | 0.750 | 0.313 | 0.438 | 0.400 |
|          | 33 | 0.188 | 0.313 | 0.063 | 0.000 | 0.125 | 0.063 | 0.267 |
| O-SNP026 | 11 | 0.000 | 0.063 | 0.125 | 0.063 | 0.000 | 0.125 | 0.063 |
|          | 31 | 0.188 | 0.188 | 0.375 | 0.625 | 0.250 | 0.063 | 0.313 |
|          | 33 | 0.813 | 0.750 | 0.500 | 0.313 | 0.750 | 0.813 | 0.625 |
| O-SNP027 | 22 | 0.313 | 0.188 | 0.563 | 0.313 | 0.375 | 0.125 | 0.250 |
|          | 23 | 0.250 | 0.188 | 0.313 | 0.438 | 0.250 | 0.688 | 0.688 |
|          | 33 | 0.438 | 0.625 | 0.125 | 0.250 | 0.375 | 0.188 | 0.063 |
| O-SNP028 | 22 | 0.000 | 0.000 | 0.313 | 0.125 | 0.063 | 0.000 | 0.000 |
|          | 42 | 0.188 | 0.125 | 0.500 | 0.750 | 0.250 | 0.000 | 0.188 |
|          | 44 | 0.813 | 0.875 | 0.188 | 0.125 | 0.688 | 1.000 | 0.813 |
| O-SNP030 | 22 | 0.813 | 0.813 | 0.000 | 0.000 | 0.563 | 1.000 | 1.000 |
|          | 42 | 0.125 | 0.188 | 0.063 | 0.313 | 0.375 | 0.000 | 0.000 |
|          | 44 | 0.063 | 0.000 | 0.938 | 0.688 | 0.063 | 0.000 | 0.000 |
| O-SNP031 | 11 | 0.313 | 0.250 | 0.438 | 0.188 | 0.063 | 0.438 | 0.313 |
|          | 13 | 0.688 | 0.750 | 0.500 | 0.375 | 0.938 | 0.563 | 0.625 |
|          | 33 | 0.000 | 0.000 | 0.063 | 0.438 | 0.000 | 0.000 | 0.063 |
| O-SNP032 | 22 | 0.250 | 0.813 | 0.125 | 0.313 | 0.250 | 0.000 | 0.438 |

|          |    |       |       |       |       |       |       |       |
|----------|----|-------|-------|-------|-------|-------|-------|-------|
|          | 24 | 0.750 | 0.188 | 0.313 | 0.563 | 0.625 | 0.625 | 0.438 |
|          | 44 | 0.000 | 0.000 | 0.563 | 0.125 | 0.125 | 0.375 | 0.125 |
| O-SNP033 | 33 | 0.000 | 0.000 | 0.750 | 0.375 | 0.000 | 0.125 | 0.063 |
|          | 34 | 0.063 | 0.125 | 0.250 | 0.500 | 0.063 | 0.375 | 0.313 |
|          | 44 | 0.938 | 0.875 | 0.000 | 0.125 | 0.938 | 0.500 | 0.625 |
| O-SNP034 | 22 | 0.563 | 0.500 | 0.063 | 0.063 | 0.688 | 0.813 | 0.625 |
|          | 24 | 0.438 | 0.438 | 0.438 | 0.500 | 0.313 | 0.125 | 0.250 |
|          | 44 | 0.000 | 0.063 | 0.500 | 0.438 | 0.000 | 0.063 | 0.125 |
| O-SNP035 | 22 | 0.750 | 0.875 | 0.375 | 0.125 | 0.813 | 0.938 | 0.813 |
|          | 23 | 0.250 | 0.125 | 0.188 | 0.625 | 0.125 | 0.000 | 0.000 |
|          | 33 | 0.000 | 0.000 | 0.438 | 0.250 | 0.063 | 0.063 | 0.188 |
| O-SNP036 | 22 | 0.000 | 0.000 | 0.063 | 0.250 | 0.000 | 0.625 | 0.500 |
|          | 24 | 1.000 | 1.000 | 0.375 | 0.500 | 1.000 | 0.375 | 0.438 |
|          | 44 | 0.000 | 0.000 | 0.563 | 0.250 | 0.000 | 0.000 | 0.063 |
| O-SNP037 | 11 | 0.375 | 0.938 | 0.000 | 0.000 | 0.313 | 0.313 | 0.313 |
|          | 31 | 0.313 | 0.063 | 0.188 | 0.125 | 0.313 | 0.625 | 0.563 |
|          | 33 | 0.313 | 0.000 | 0.813 | 0.875 | 0.375 | 0.063 | 0.125 |
| O-SNP038 | 11 | 0.250 | 0.063 | 0.000 | 0.063 | 0.125 | 0.000 | 0.063 |
|          | 21 | 0.000 | 0.063 | 0.000 | 0.188 | 0.000 | 0.313 | 0.313 |
|          | 22 | 0.750 | 0.875 | 1.000 | 0.750 | 0.875 | 0.688 | 0.625 |
| O-SNP039 | 22 | 0.188 | 0.250 | 0.125 | 0.000 | 0.125 | 0.125 | 0.063 |
|          | 24 | 0.188 | 0.250 | 0.188 | 0.375 | 0.438 | 0.125 | 0.250 |
|          | 44 | 0.625 | 0.500 | 0.688 | 0.625 | 0.438 | 0.750 | 0.688 |
| O-SNP040 | 11 | 0.250 | 0.688 | 0.000 | 0.000 | 0.500 | 0.250 | 0.438 |
|          | 21 | 0.563 | 0.125 | 0.438 | 0.063 | 0.313 | 0.500 | 0.375 |
|          | 22 | 0.188 | 0.188 | 0.563 | 0.938 | 0.188 | 0.250 | 0.188 |
| O-SNP041 | 22 | 0.000 | 0.000 | 0.188 | 0.063 | 0.000 | 0.063 | 0.063 |
|          | 23 | 0.188 | 0.375 | 0.375 | 0.188 | 0.438 | 0.375 | 0.250 |
|          | 33 | 0.813 | 0.625 | 0.438 | 0.750 | 0.563 | 0.563 | 0.688 |
| O-SNP042 | 22 | 0.188 | 0.000 | 0.625 | 0.750 | 0.188 | 0.063 | 0.000 |
|          | 24 | 0.250 | 0.000 | 0.313 | 0.188 | 0.125 | 0.500 | 0.188 |
|          | 44 | 0.563 | 1.000 | 0.063 | 0.063 | 0.688 | 0.438 | 0.813 |
| O-SNP044 | 22 | 0.250 | 0.250 | 0.000 | 0.000 | 0.250 | 0.625 | 0.313 |
|          | 24 | 0.438 | 0.313 | 0.125 | 0.000 | 0.625 | 0.250 | 0.625 |
|          | 44 | 0.313 | 0.438 | 0.875 | 1.000 | 0.125 | 0.125 | 0.063 |
| O-SNP045 | 22 | 0.375 | 0.750 | 0.000 | 0.000 | 0.625 | 0.375 | 0.563 |
|          | 24 | 0.625 | 0.188 | 0.063 | 0.313 | 0.188 | 0.563 | 0.250 |
|          | 44 | 0.000 | 0.063 | 0.938 | 0.688 | 0.188 | 0.063 | 0.188 |
| O-SNP046 | 22 | 0.188 | 0.188 | 0.500 | 0.938 | 0.000 | 0.563 | 0.063 |
|          | 23 | 0.625 | 0.250 | 0.500 | 0.063 | 0.250 | 0.313 | 0.563 |
|          | 33 | 0.188 | 0.563 | 0.000 | 0.000 | 0.750 | 0.125 | 0.375 |
| O-SNP047 | 11 | 0.063 | 0.000 | 0.938 | 0.625 | 0.000 | 0.125 | 0.000 |
|          | 31 | 0.188 | 0.063 | 0.063 | 0.313 | 0.000 | 0.188 | 0.000 |
|          | 33 | 0.750 | 0.938 | 0.000 | 0.063 | 1.000 | 0.688 | 1.000 |

---
